# Supplementary material for: Functionalization of Biphenylcarbazole (CBP) with Siloxane-hybrid Chains for Solvent-Free Liquid Materials
Source: Preprints.org preprint supplement (doi:10.20944/preprints202112.0222.v1), 2021-12-14

# *Supporting Information To:*

## **Functionalization of biphenylcarbazole (CBP) with siloxane-hybrid chains for solvent-free liquid materials**

Janah Shaya<sup>1,2,3\*</sup>, Gabriel Correia<sup>1</sup>, Benoît Heinrich<sup>1</sup>, Jean-Charles Ribierre<sup>4</sup>, Kyriaki Polychronopoulou<sup>5,6</sup>, Loïc Mager<sup>1</sup>, Stéphane Méry<sup>1\*</sup>

<sup>1</sup> CNRS-Strasbourg University, IPCMS UMR7504, 23 rue du Loess, BP 43, 67034 Strasbourg, Cedex, France

<sup>2</sup> Department of Chemistry, College of Arts and Sciences, Khalifa University, Abu Dhabi P.O. Box 127788, United Arab Emirates

<sup>3</sup> College of Medicine and Health Sciences, Khalifa University, Abu Dhabi P.O. Box 127788, United Arab Emirates;

<sup>4</sup> Center for Organic Photonics and Electronics Research (OPERA), Kyushu University, 744 Motooka, Nishi, Fukuoka 819-0395, Japan

<sup>5</sup> Department of Mechanical Engineering, Khalifa University of Science and Technology, Abu Dhabi, P.O. Box 127788, UAE

<sup>6</sup> Center for Catalysis and Separation, Khalifa University of Science and Technology, Abu Dhabi, P.O. Box 127788, UAE

\* Corresponding authors

## *Table of contents*

|                                               | <i>Pages</i>  |
|-----------------------------------------------|---------------|
| <i>NMR and MALDI Methods.....</i>             | <i>S2</i>     |
| <i>Characterization of product (2).....</i>   | <i>S2</i>     |
| <i>Characterization of product (3).....</i>   | <i>S3</i>     |
| <i>Characterization of product (4a).....</i>  | <i>S3-4</i>   |
| <i>Characterization of product (4b).....</i>  | <i>S4</i>     |
| <i>Characterization of product (7a).....</i>  | <i>S5-6</i>   |
| <i>Characterization of product (7b).....</i>  | <i>S6-7</i>   |
| <i>Characterization of product (8).....</i>   | <i>S7-8</i>   |
| <i>Characterization of product (9).....</i>   | <i>S8-9</i>   |
| <i>Characterization of product (13a).....</i> | <i>S9-10</i>  |
| <i>Characterization of product (13b).....</i> | <i>S11</i>    |
| <i>Characterization of product (14a).....</i> | <i>S12</i>    |
| <i>Characterization of product (14b).....</i> | <i>S13-14</i> |

$^1\text{H}$  and  $^{13}\text{C}$  NMR spectra were recorded on a Bruker Avance 300 and a Bruker 400 Ultrashield™ NMR spectrometers, with an internal lock on the  $2\text{H}$ -signal of the solvent. Chemical shifts ( $\delta$ ) are given in ppm to the nearest 0.01 ( $^1\text{H}$ ) or 0.1 ppm ( $^{13}\text{C}\{^1\text{H}\}$  NMR) (recorded with complete proton decoupling and written as  $^{13}\text{C}$  in the experimental part for simplicity). The coupling constants ( $J$ ) are given in Hertz (Hz). The signals are reported as follows: (s = singlet, d = doublet, t = triplet, quint = quintet, m = multiplet). Mass spectra analyses were performed by using a Maldi-TOF or GC/MS. The former were carried out on a time-of-flight mass spectrometer (MALDI-TOF-TOF Autoflex II TOF-TOF, Bruker Daltonics, Bremen, Germany) equipped with a nitrogen laser ( $\lambda = 337 \text{ nm}$ ). The latter was carried out on a gas chromatograph coupled with an electron ionization mass spectrometer 7090-5975C from Agilent Technologies.

### $^1\text{H}$ NMR of (2)

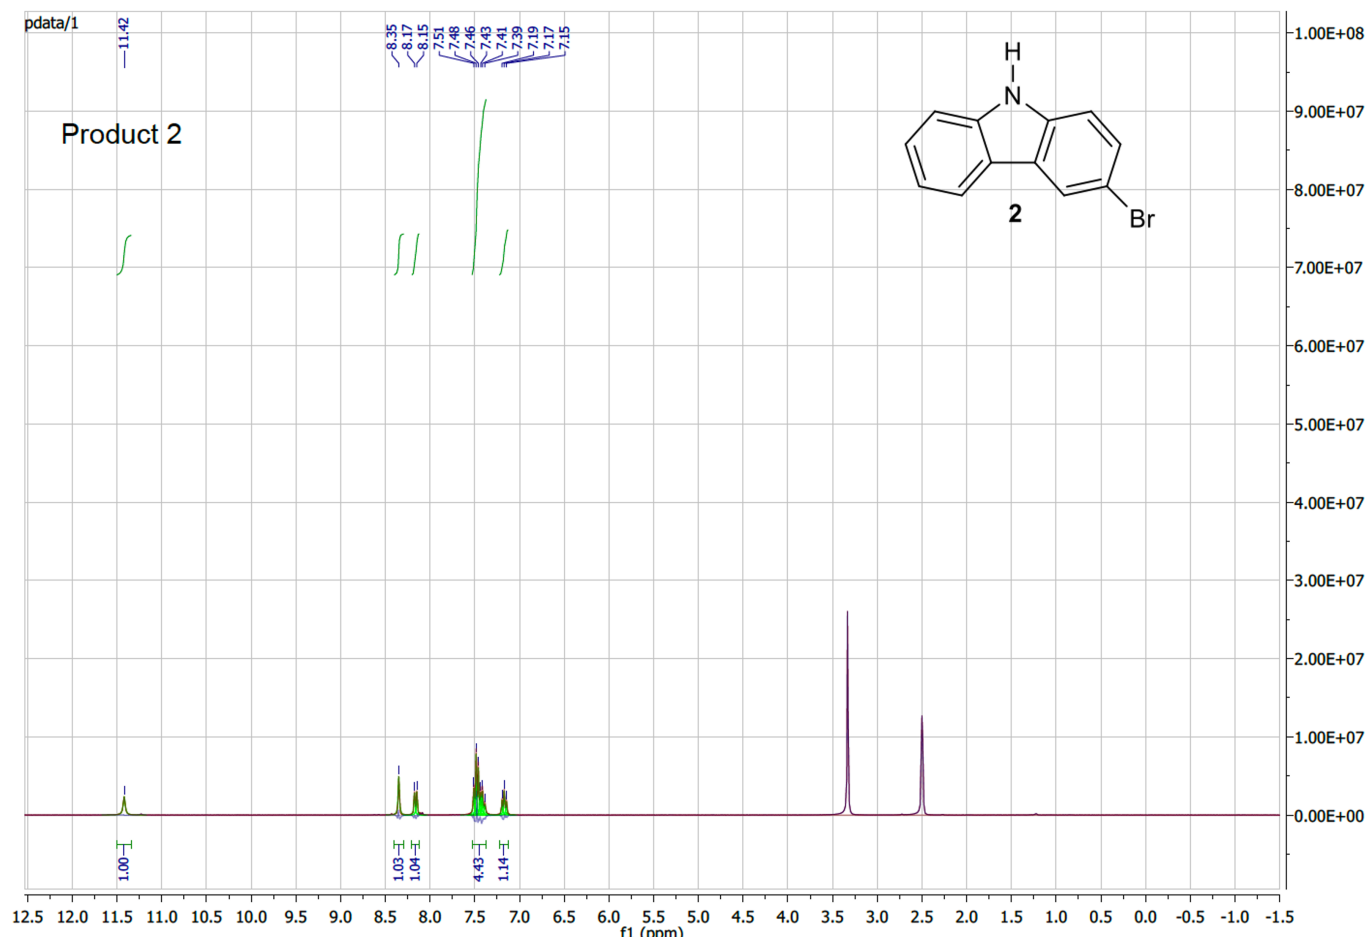

# <sup>1</sup>H NMR of (3)

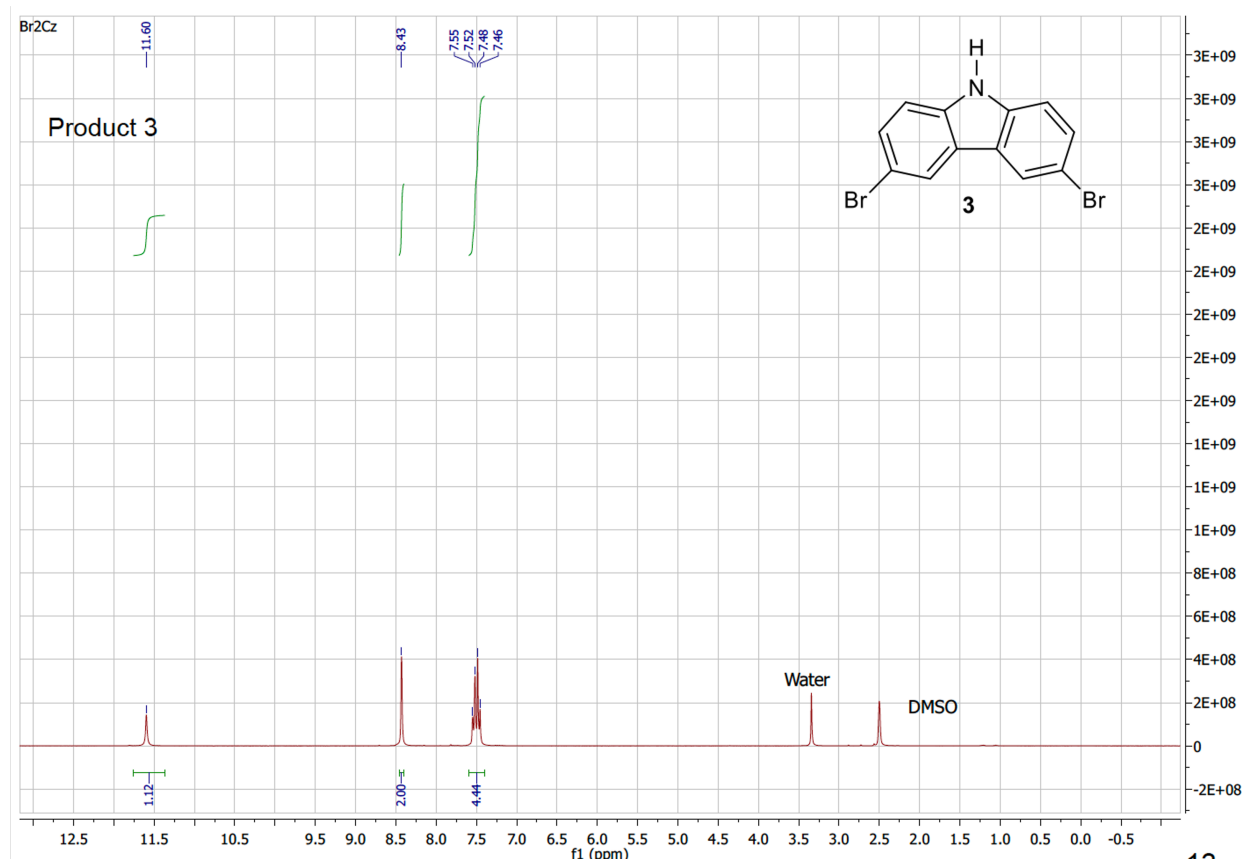

# <sup>1</sup>H NMR of (4a)

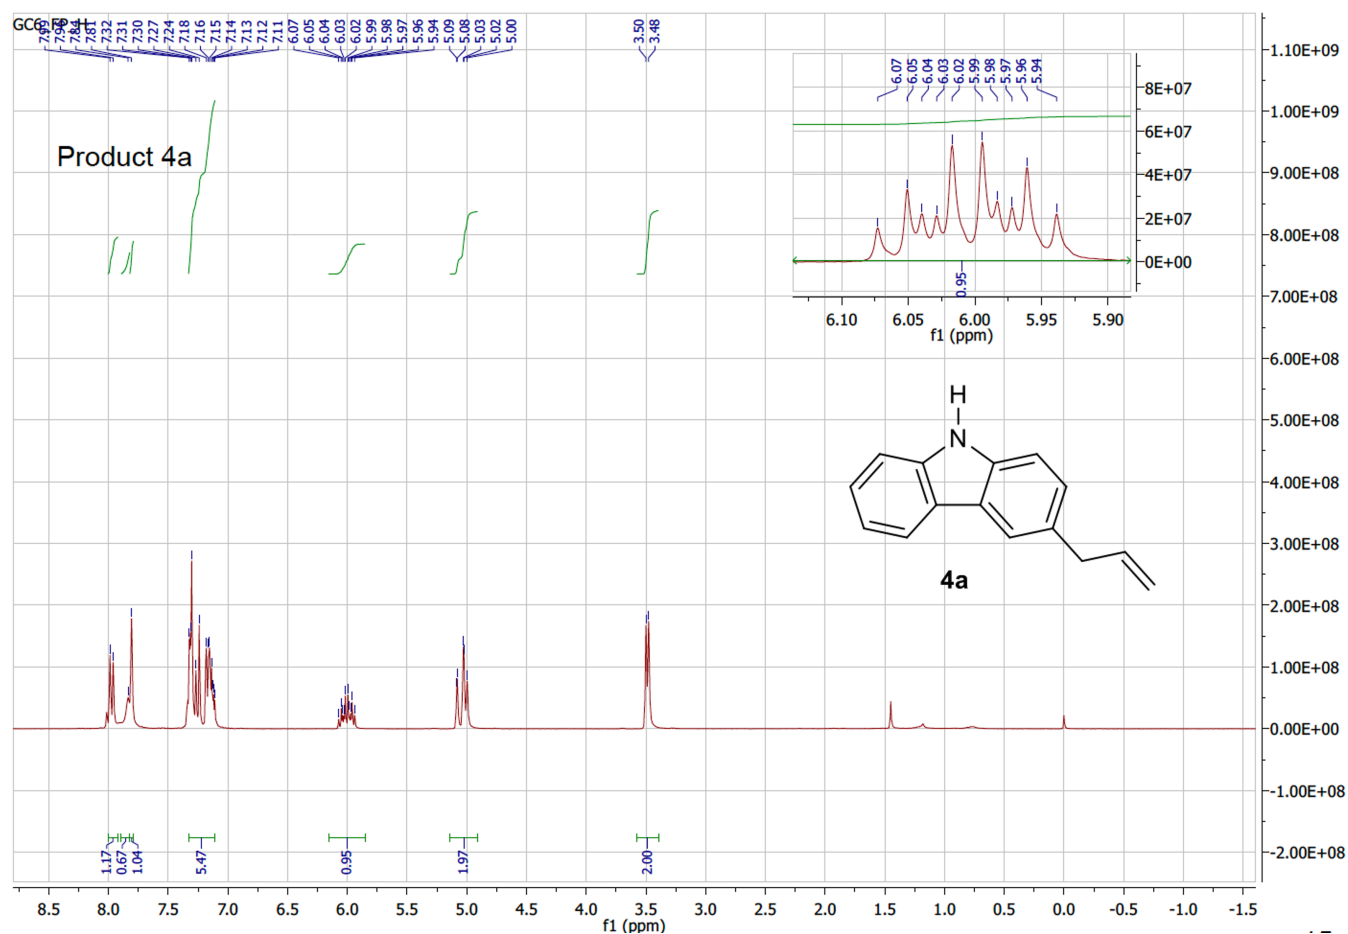

### <sup>13</sup>C NMR of (4a)

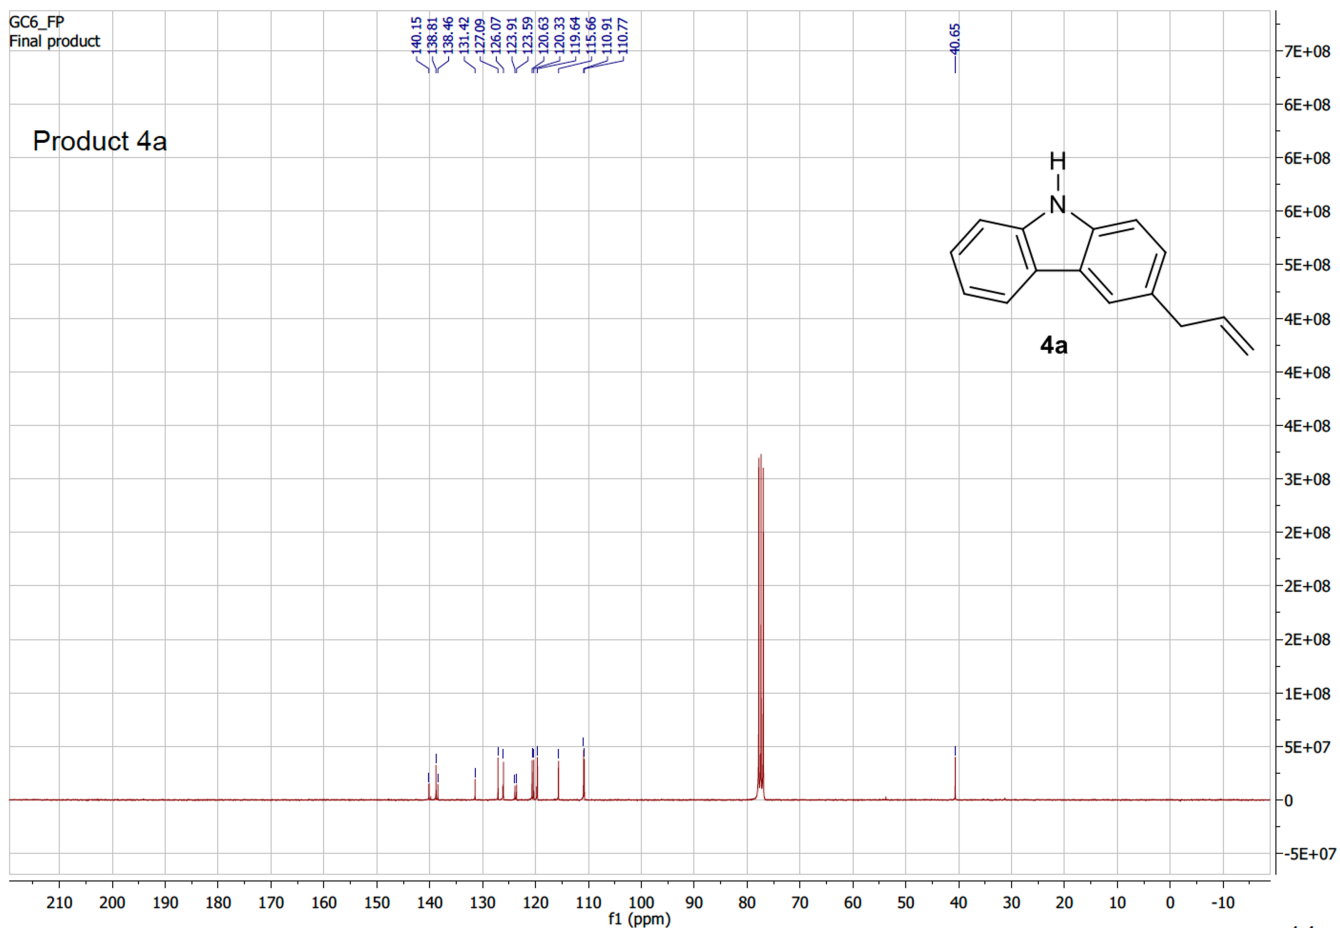

### <sup>1</sup>H NMR of (4b)

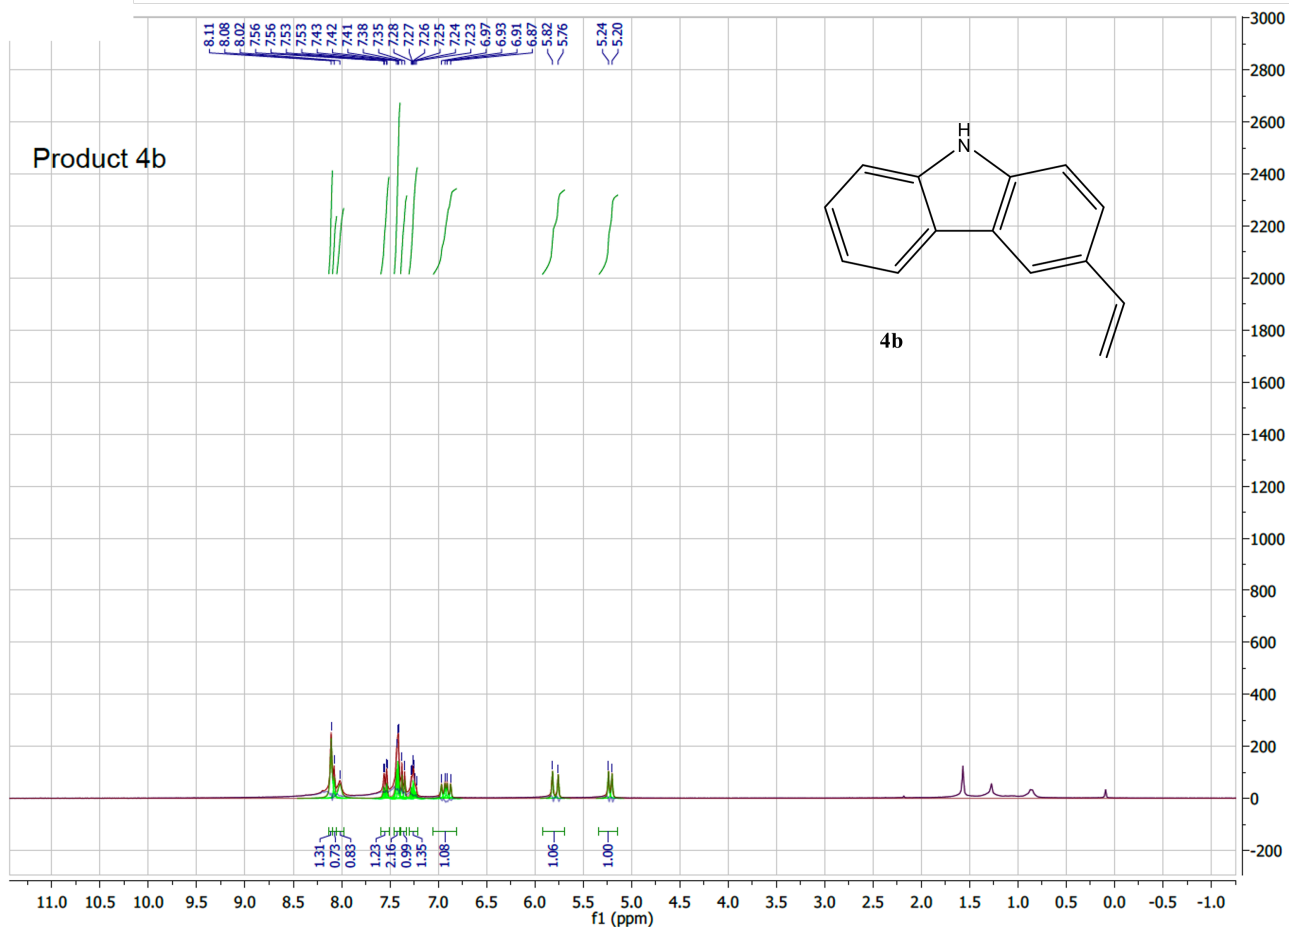



# <sup>1</sup>H NMR of (7a)

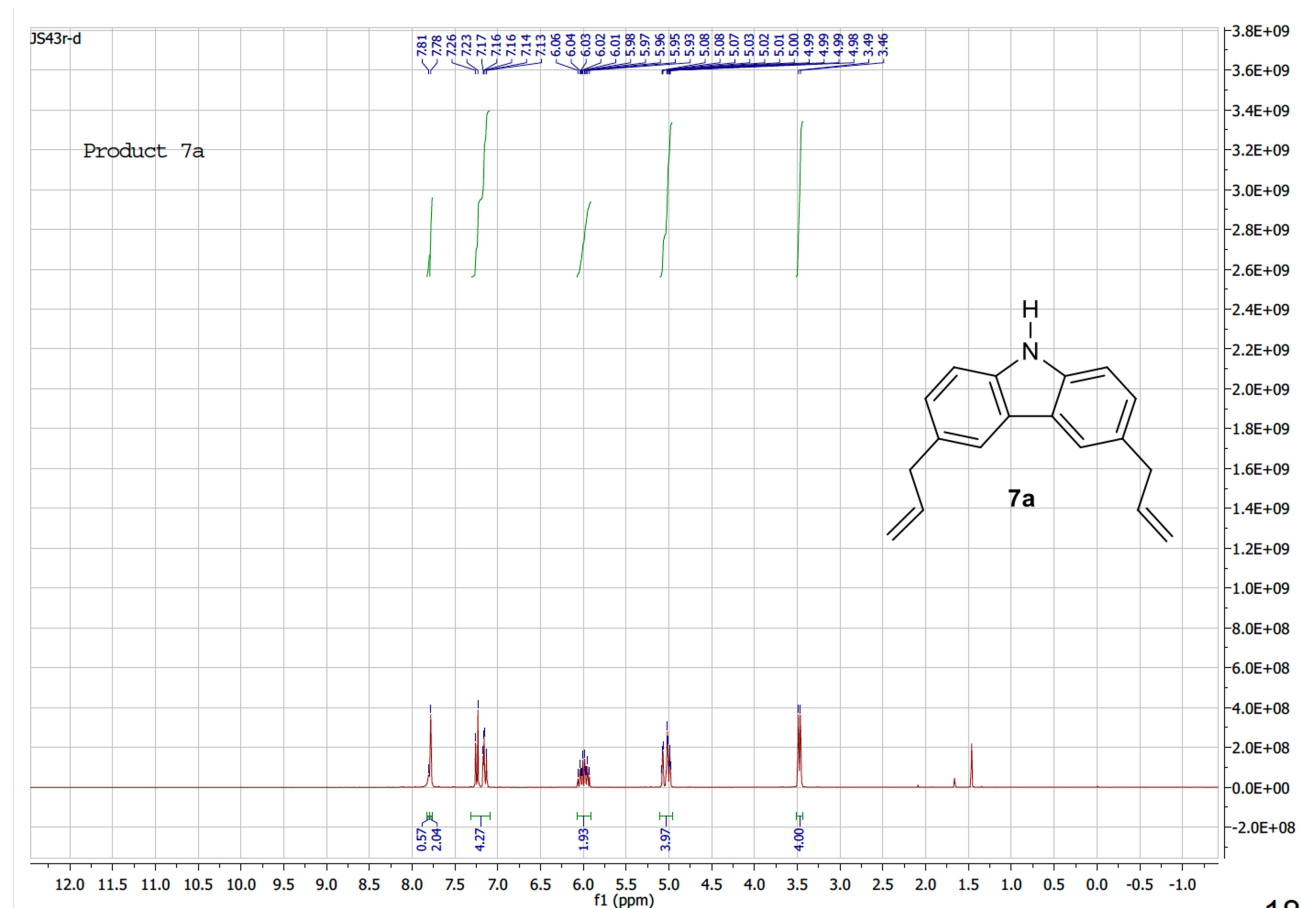

# <sup>13</sup>C NMR of (7a)

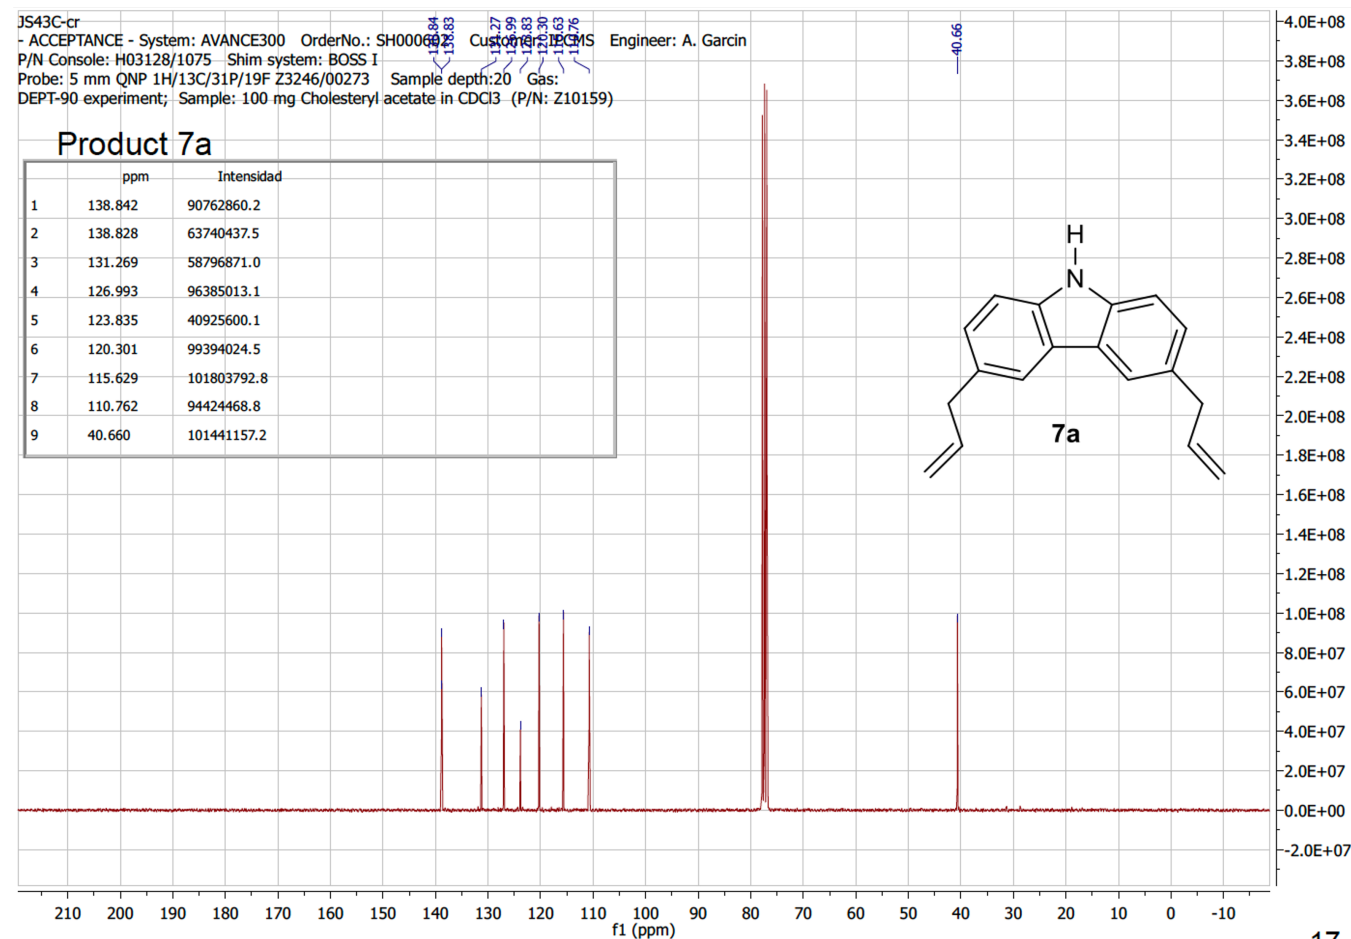

## MALDI of (7a)

Product 7a

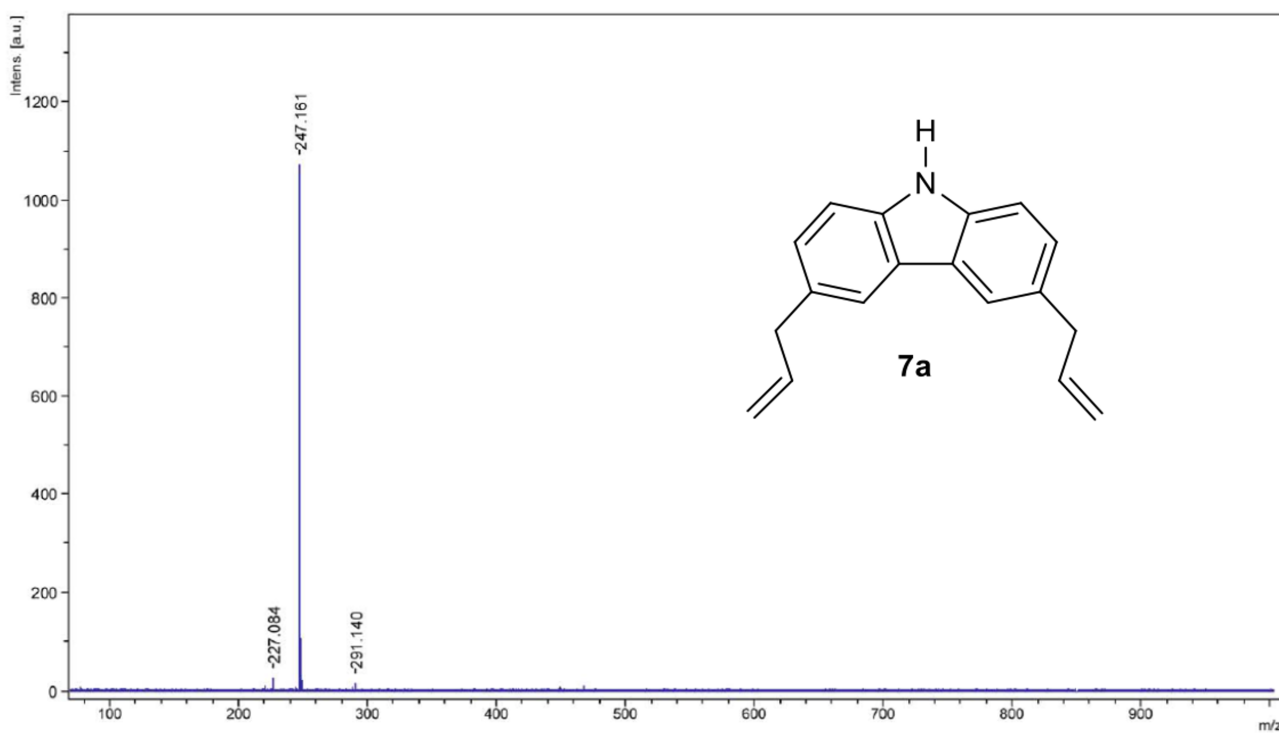

## <sup>1</sup>H NMR of (7b)

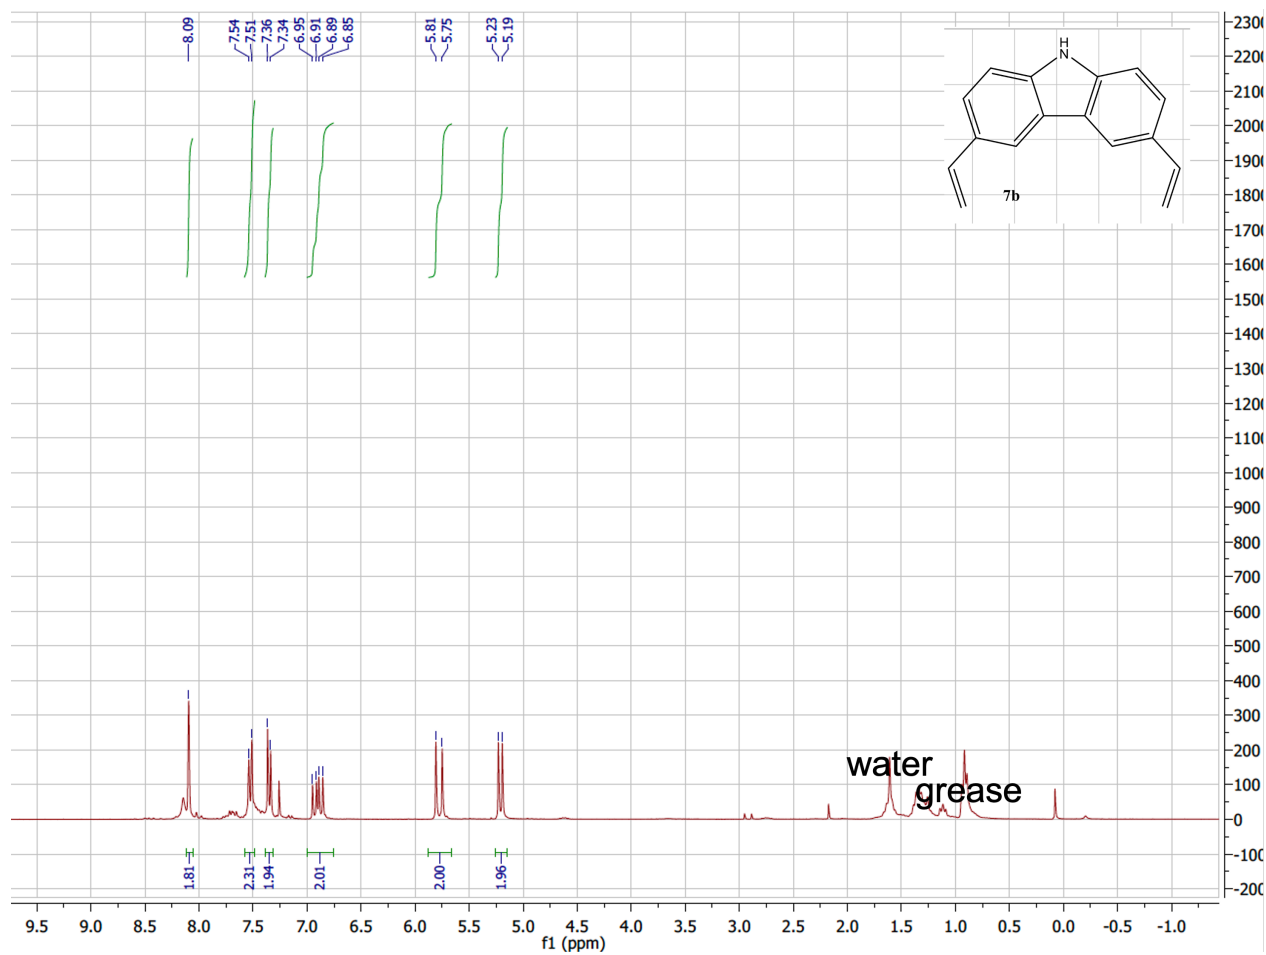

## <sup>13</sup>C NMR of (7b)

ACCEPTANCE - System: AVANCE300 OrderNo.: SH000600 Customer: IPCB Engineer: A. Garcin  
P/N Console: H03128/1075 Shim system: BOSS 1  
Probe: 5 mm QNP 1H/13C/31P/19F Z3246/00273 Sample depth: 20 Gas:  
DEPT-90 experiment; Sample: 100 mg Cholesteryl acetate in CDCl<sub>3</sub> (P/N: Z10159)

Product 7b

| ppm       | Intensidad |
|-----------|------------|
| 1 139.846 | 3266.2     |
| 2 137.584 | 7054.2     |
| 3 129.804 | 3918.4     |
| 4 124.494 | 7068.8     |
| 5 123.736 | 2914.4     |
| 6 118.537 | 7042.8     |
| 7 111.477 | 7018.7     |
| 8 110.849 | 7246.5     |

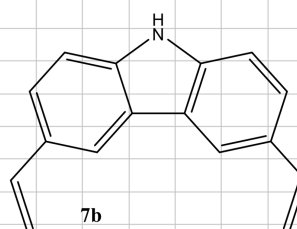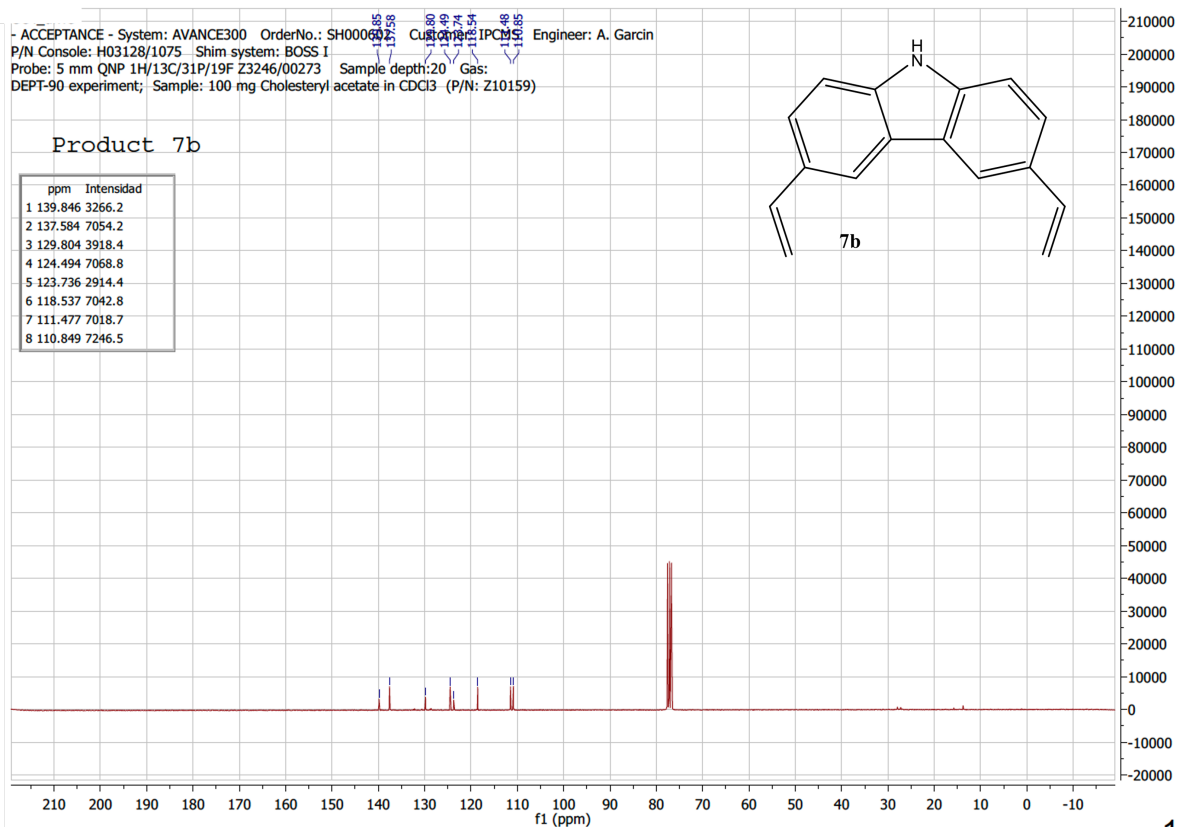

## <sup>1</sup>H NMR of (8)

Product 8

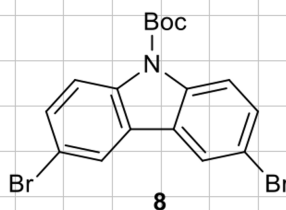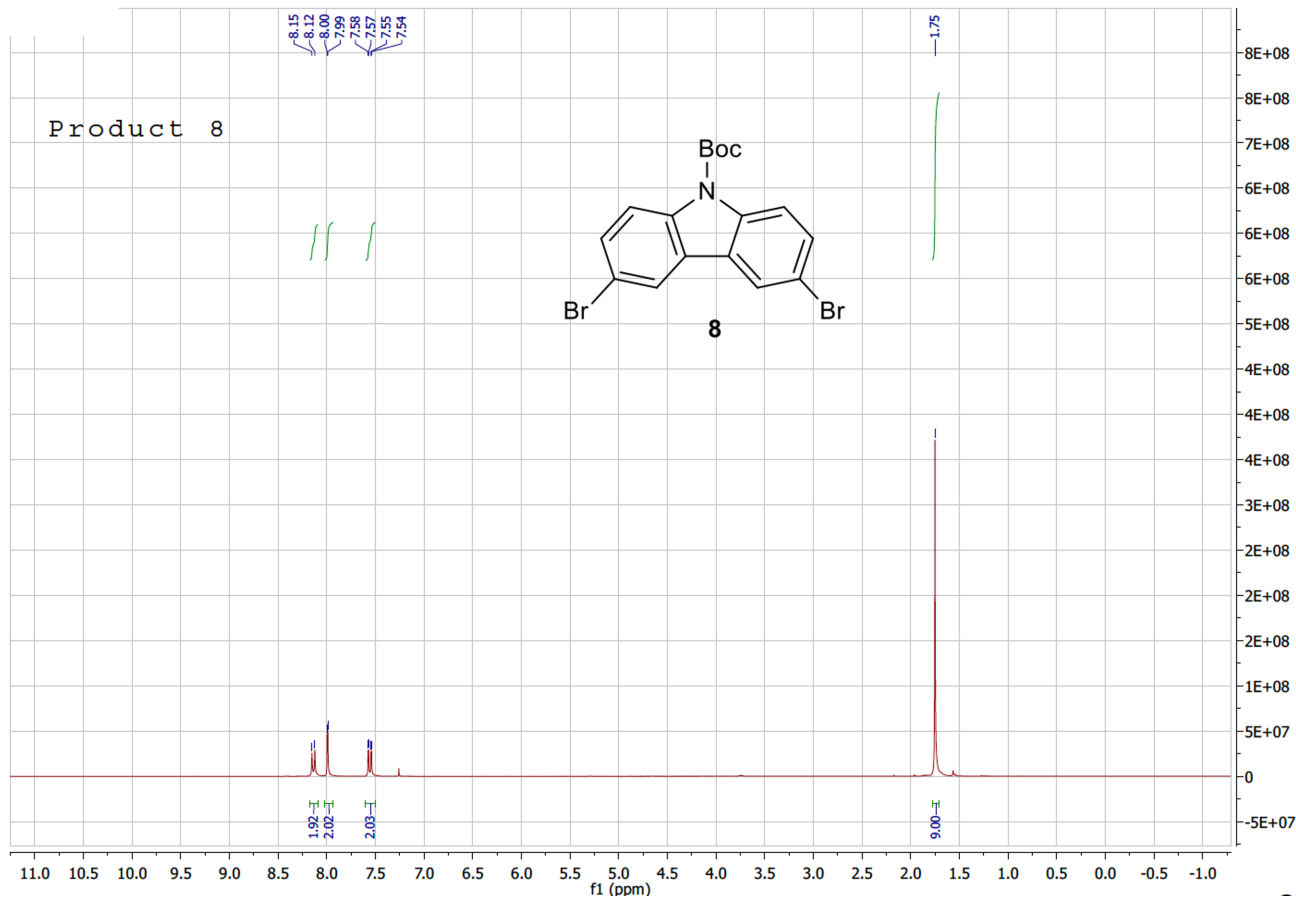

## <sup>13</sup>C NMR of (8)

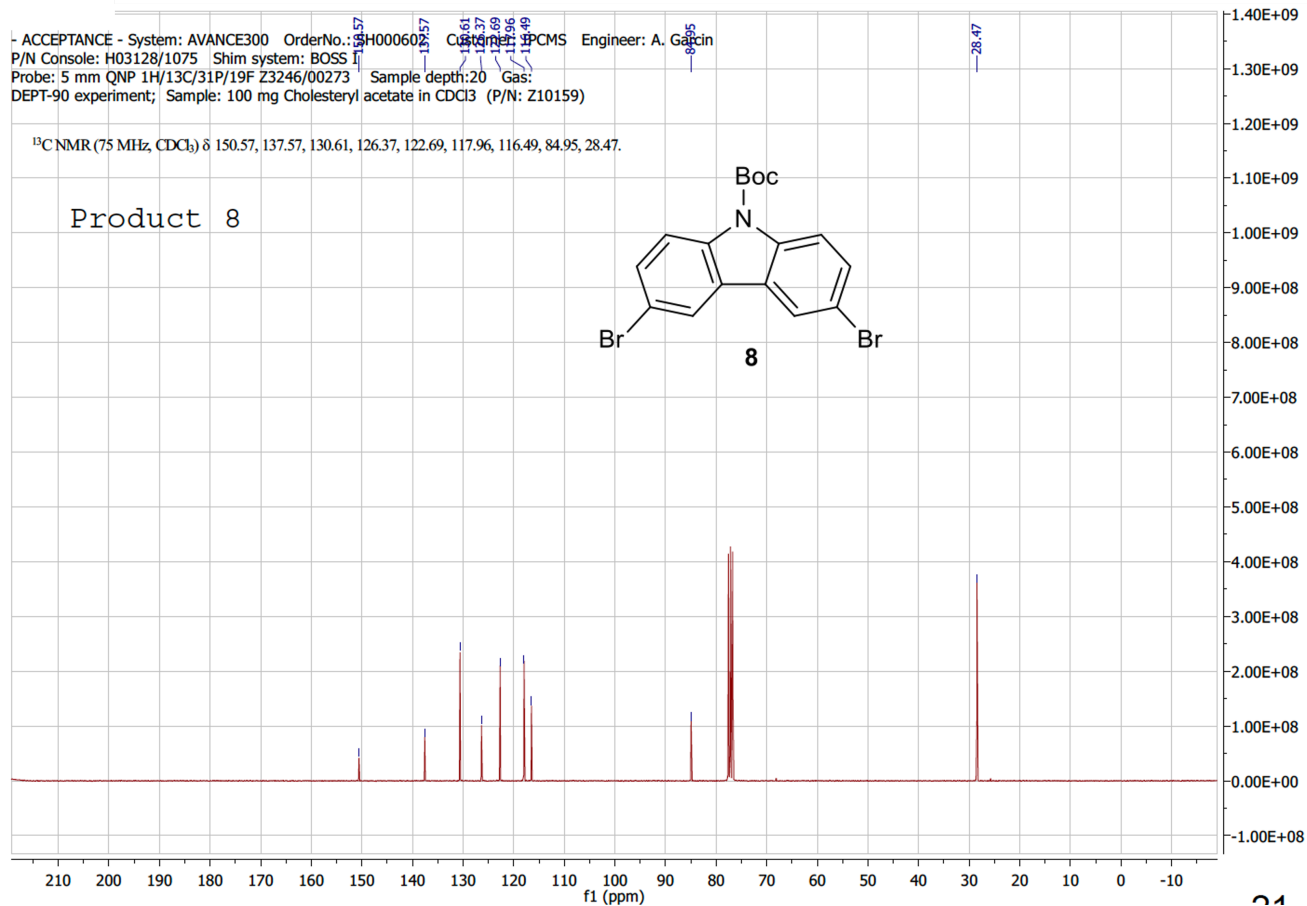

## <sup>1</sup>H NMR of (9)

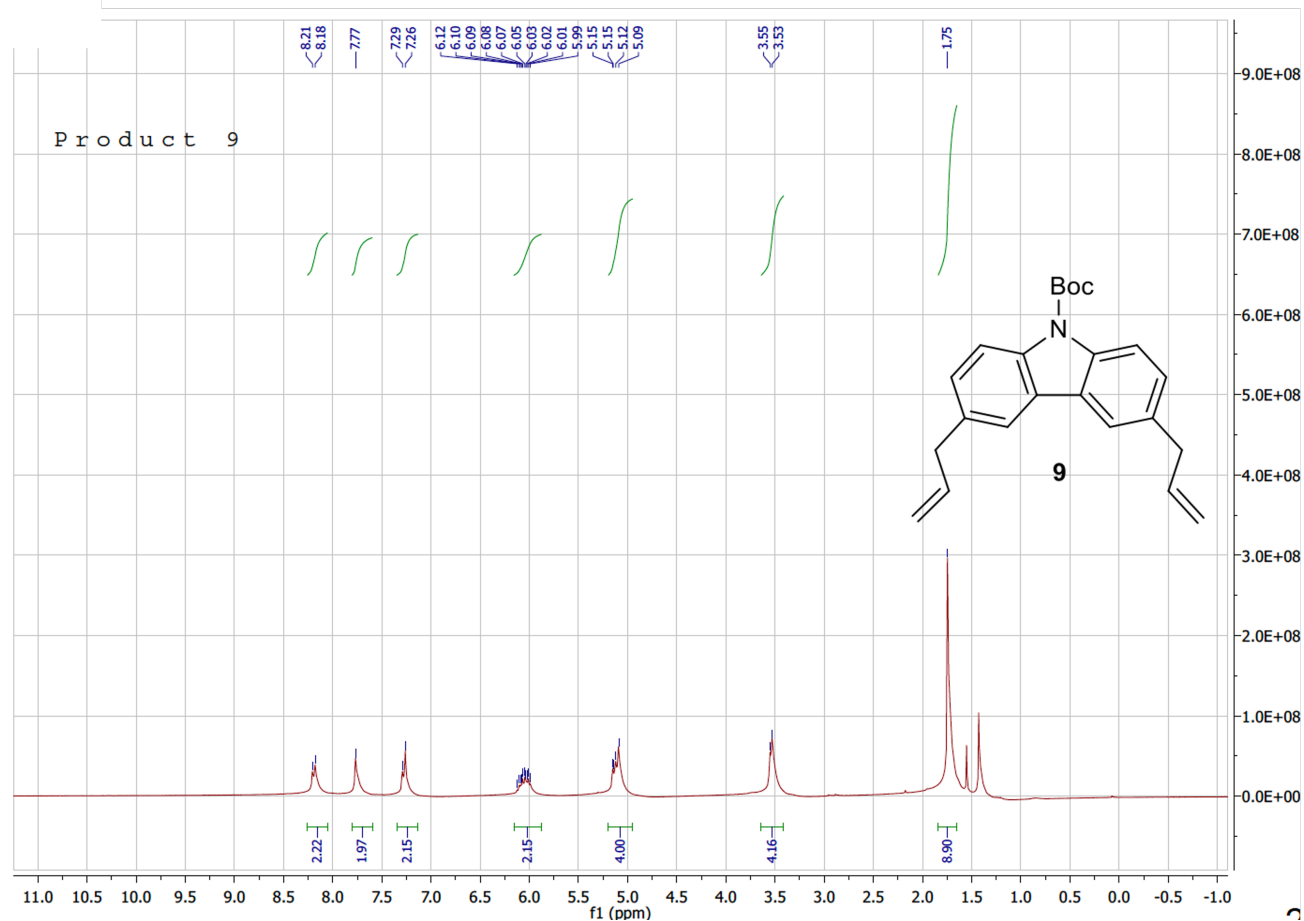

## <sup>13</sup>C NMR of (9)

- ACCEPTANCE - System: AVANCE300 OrderNo.: SH000602 Customer: IPCMS Engineer: A. Gacoin  
P/N Console: H03128/1075 Shim system: BOSS  
Probe: 5 mm QNP 1H/13C/31P/19F Z3246/00273 Sample depth: 20 Gas:  
DEPT-90 experiment; Sample: 100 mg Cholesteryl acetate in CDCl<sub>3</sub> (P/N: Z10159)

<sup>13</sup>C NMR (75 MHz, CDCl<sub>3</sub>) δ 151.25, 137.99, 137.44, 134.80, 127.85, 126.07, 119.45, 116.27, 115.88, 83.77, 40.18, 28.53.

Product 9

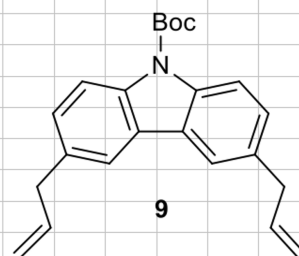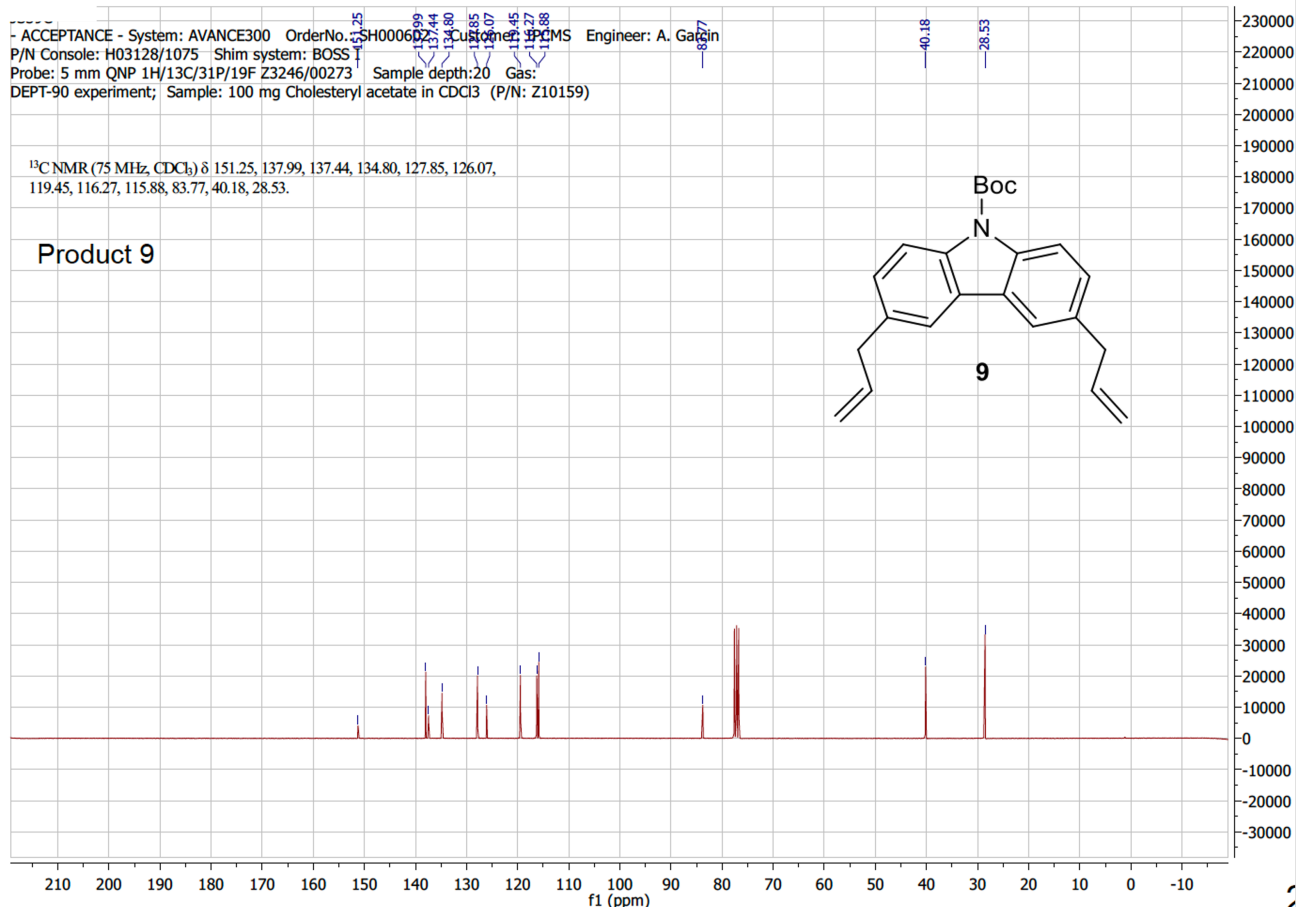

## <sup>1</sup>H NMR of (13a)

Product 13a

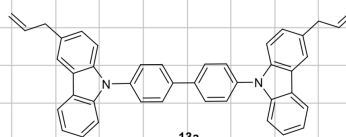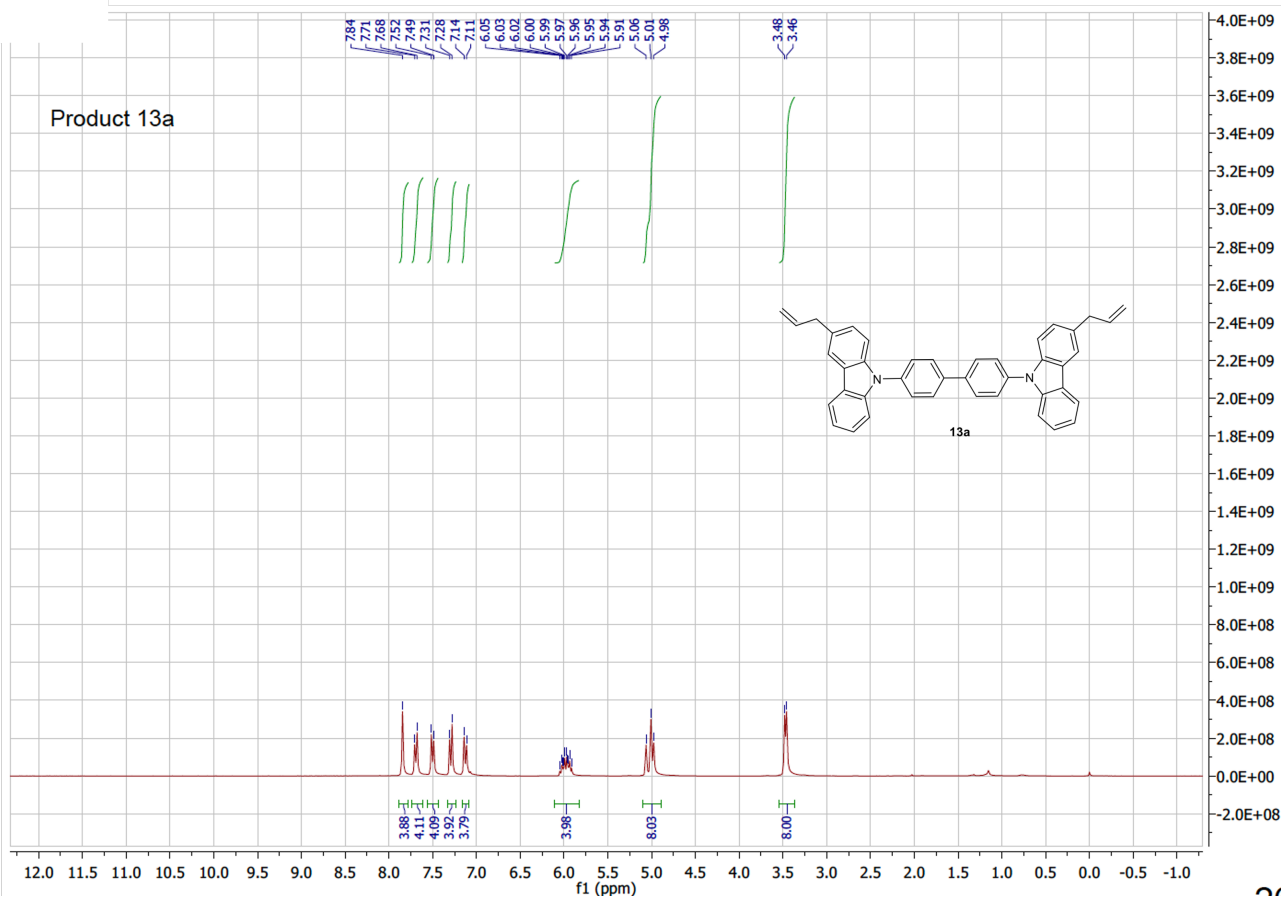

## <sup>13</sup>C NMR of (13a)

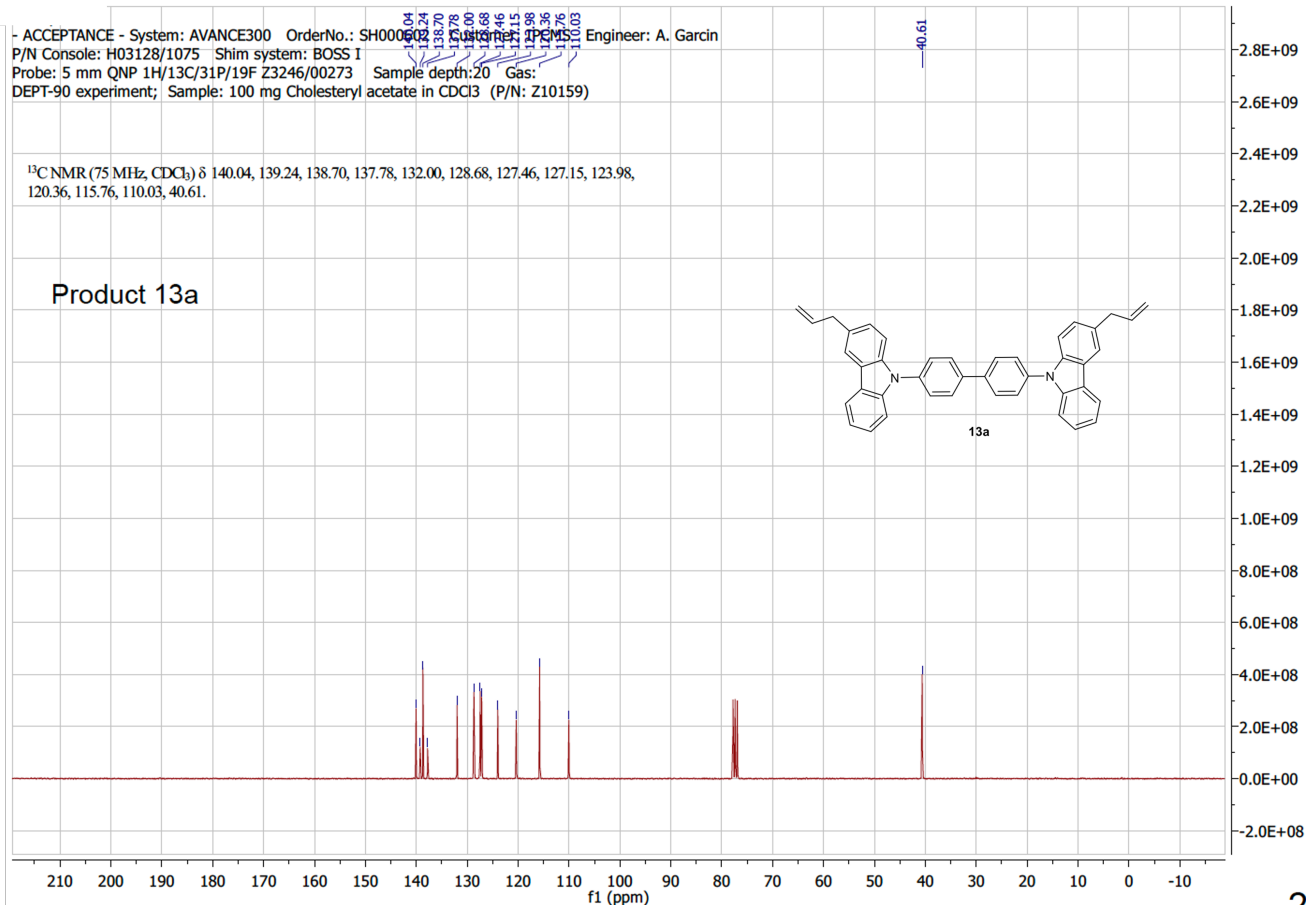

## MALDI of (13a)

Product 13a

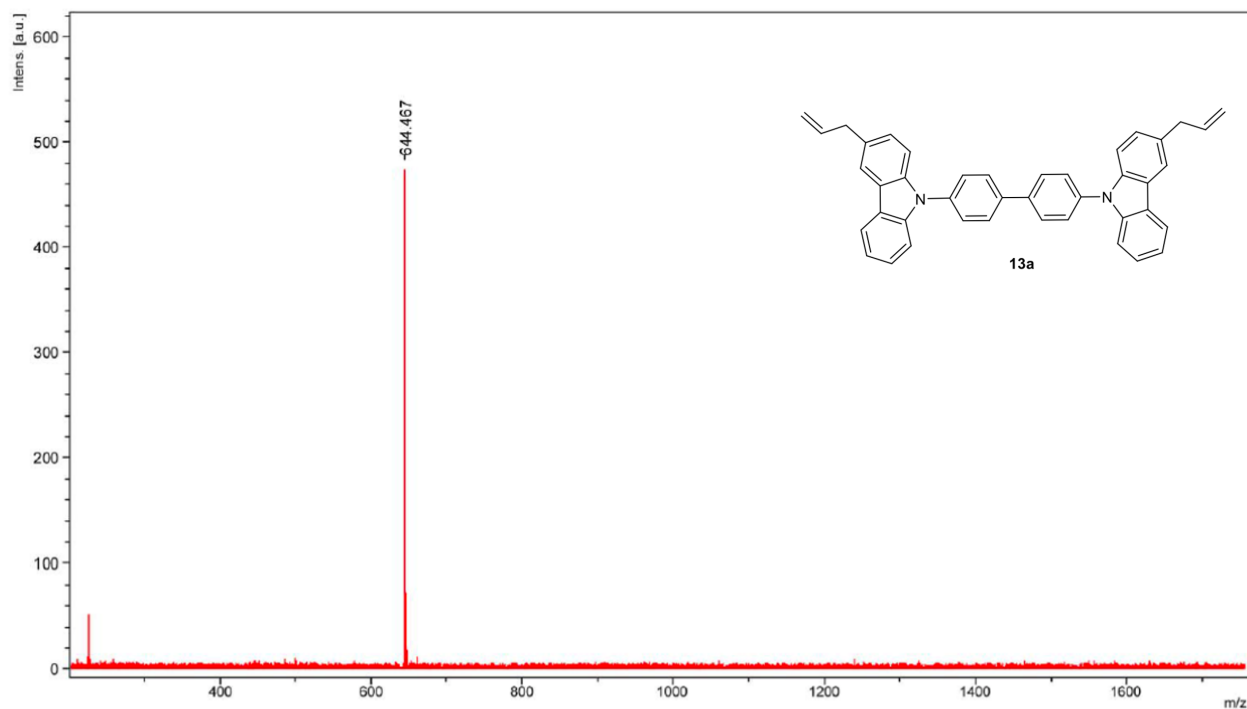

# <sup>1</sup>H NMR of (13b)

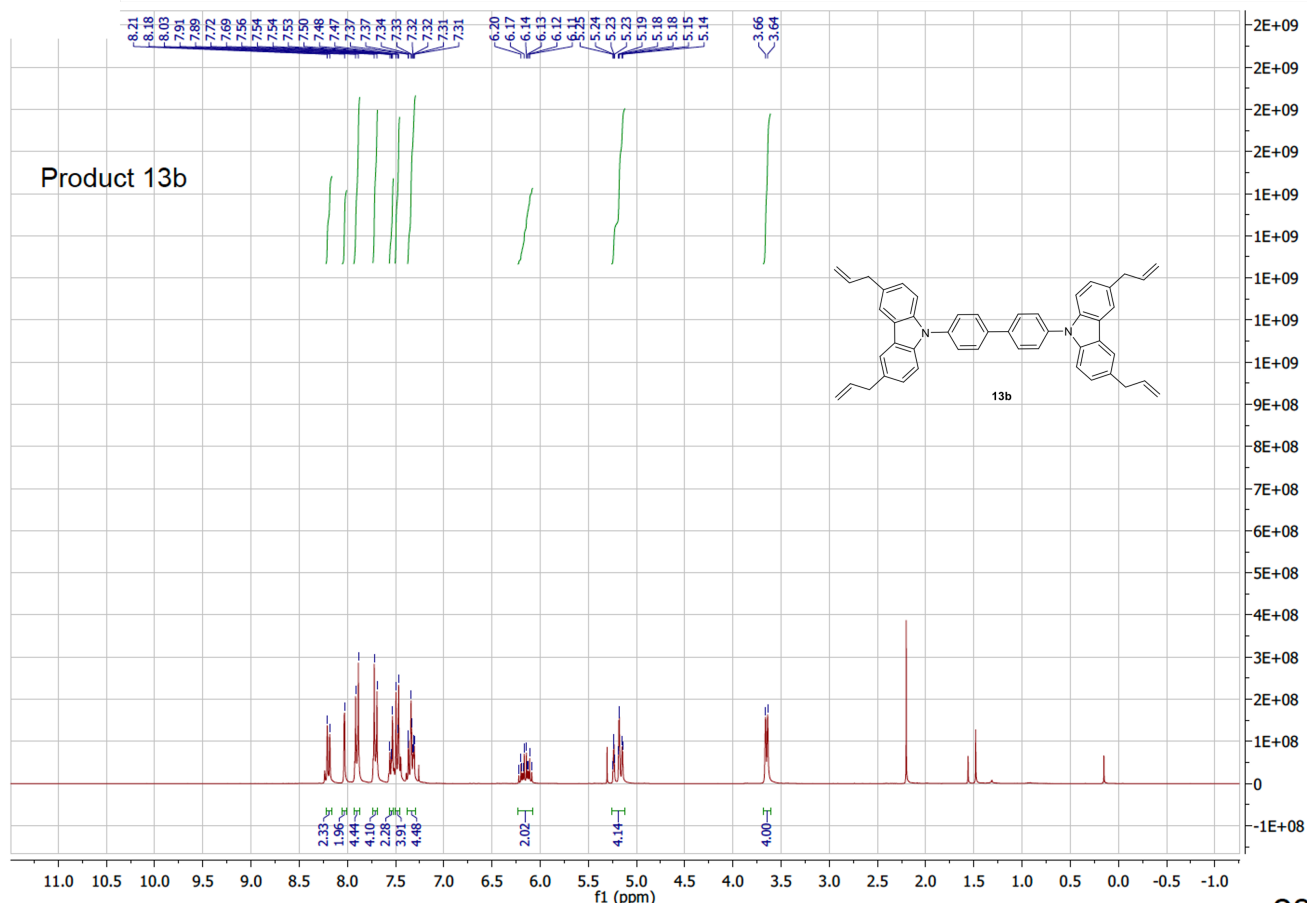

# <sup>13</sup>C NMR of (13b)

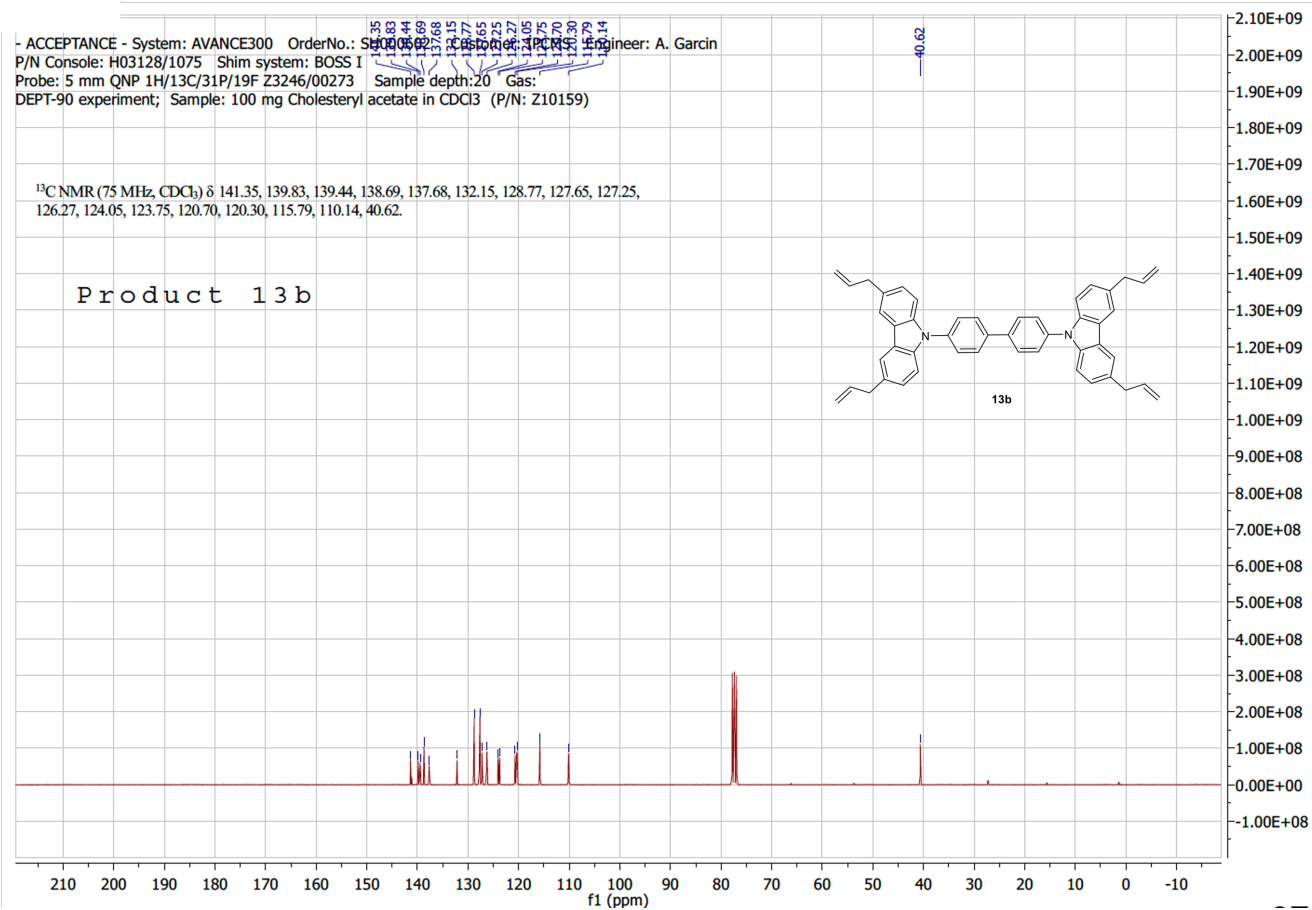

## <sup>1</sup>H NMR of (14a)

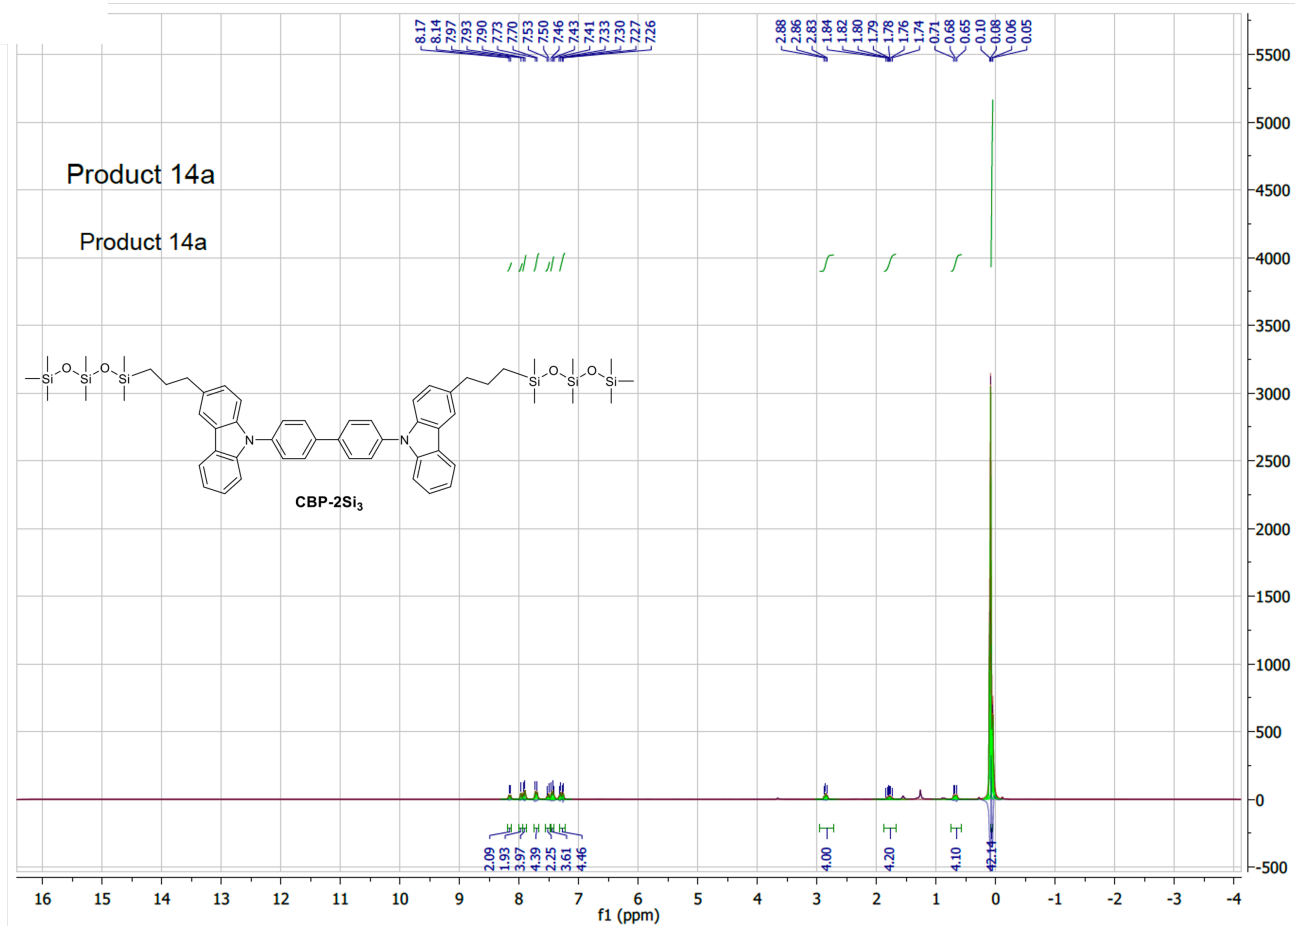

## MALDI of (14a)

Product 14a

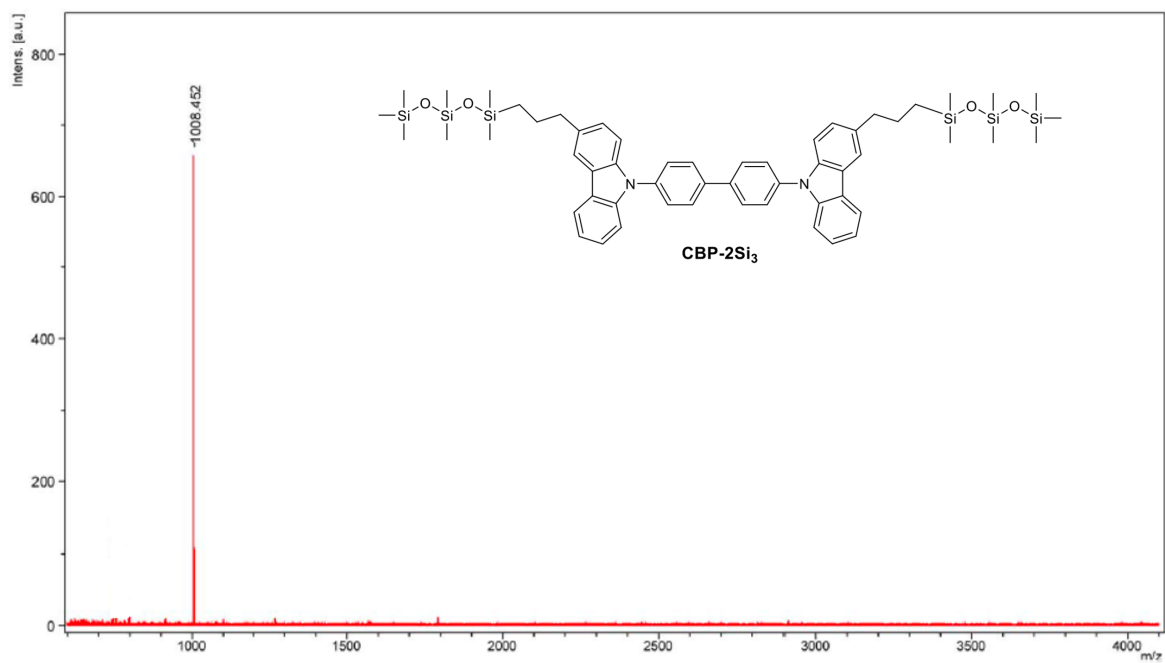



# <sup>1</sup>H NMR of (14b)

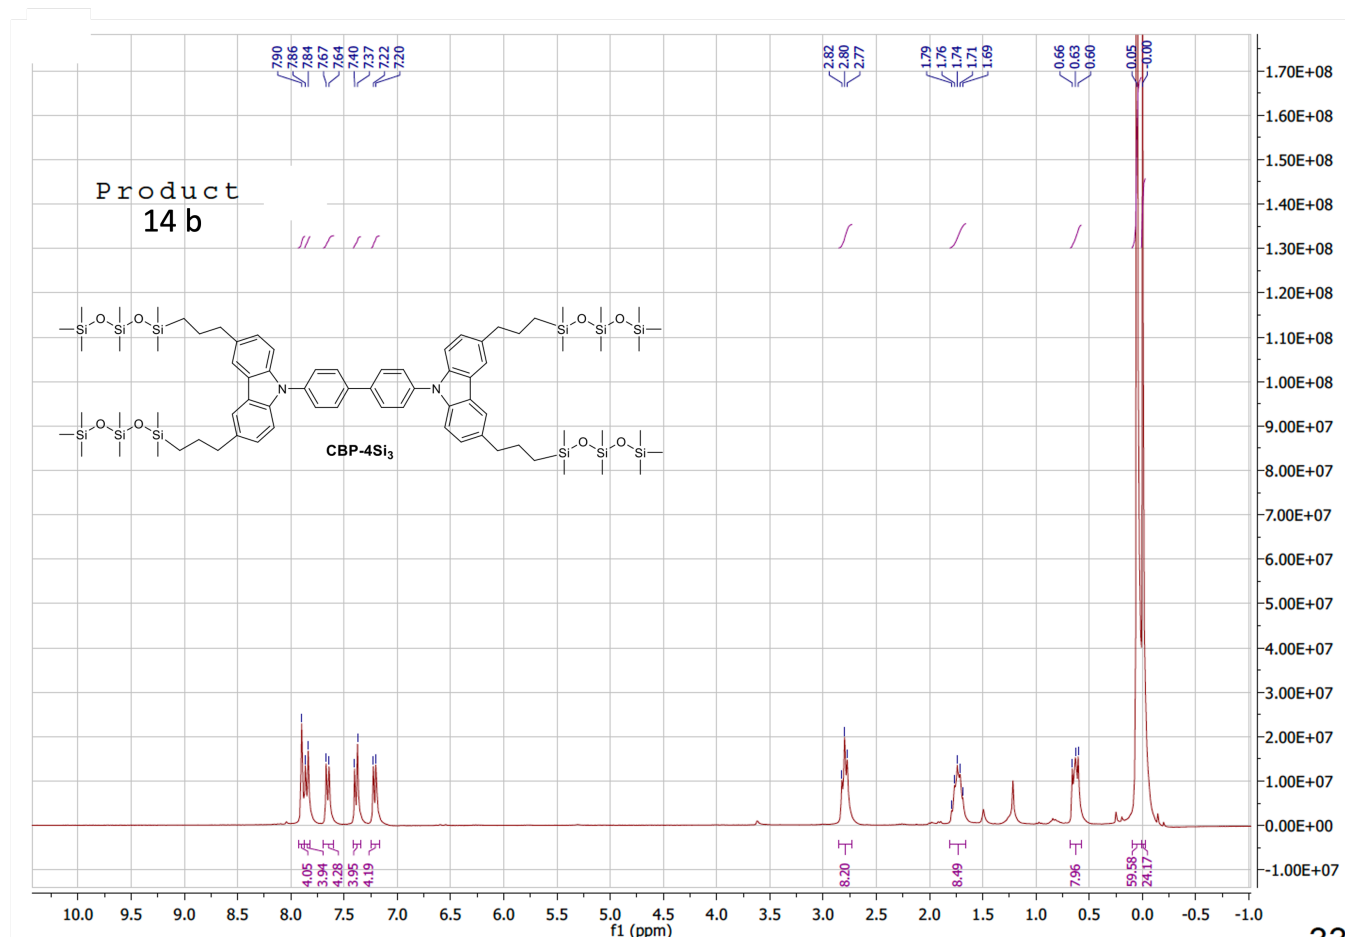

# <sup>13</sup>C NMR of (14b)

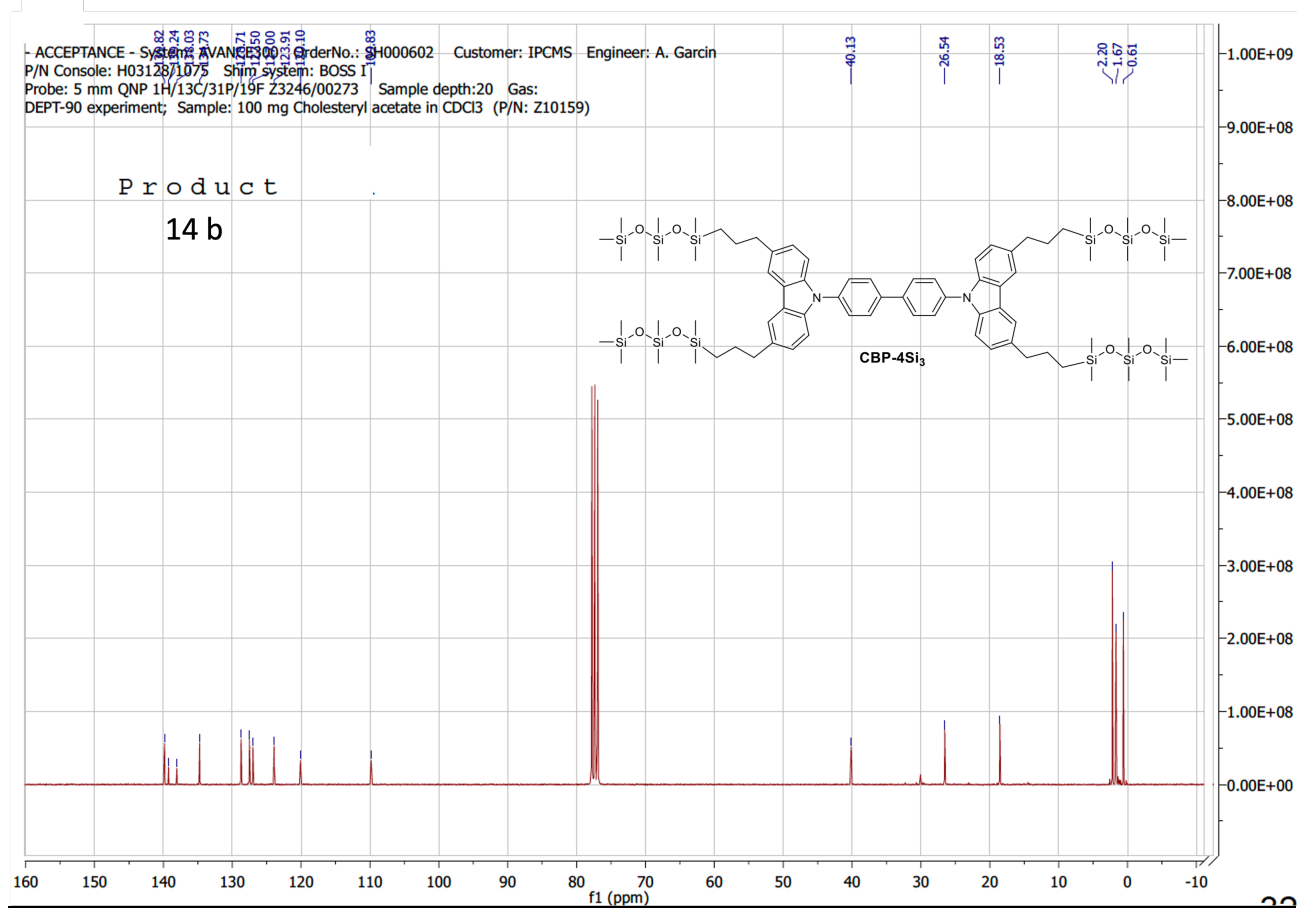

## MALDI of (14b)

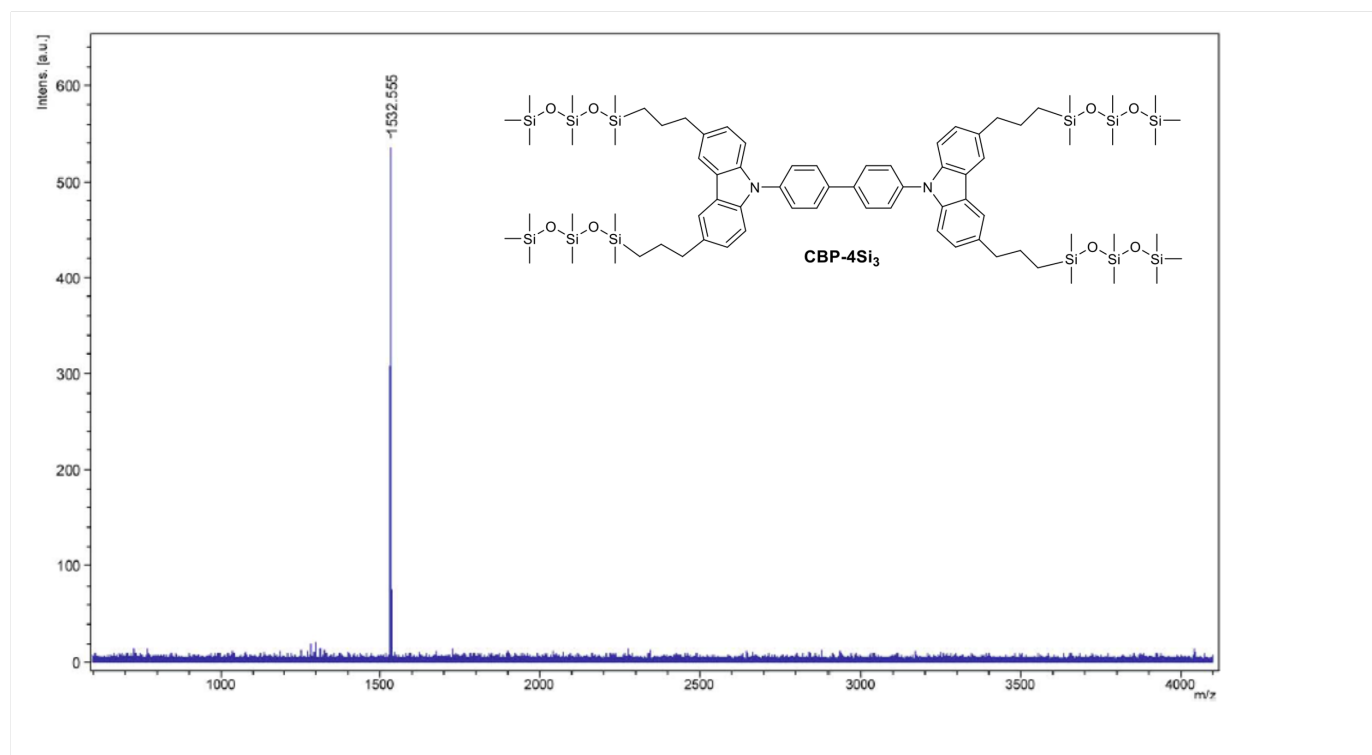

Supplement: Supplementary file 1 [file supplementary]
